# Supplementary material
Source: MDPI journal article supplement (https://www.mdpi.com/2075-5309/9/1/8)
Supplement: s1 [file s1]

Article (Supplementary Materials)

# Industrial Data-Based Life Cycle Assessment of Architecturally Integrated Glass-Glass Photovoltaics: Supplementary Data

Jeeyoung Park <sup>1,†</sup> , Dirk Hengevoss <sup>2,†</sup> and Stephen Wittkopf <sup>1,\*</sup> 

<sup>1</sup> Lucerne University of Applied Sciences and Arts, School of Engineering and Architecture, Technikumstrasse 21, CH-6048 Horw, Switzerland

<sup>2</sup> Institute for Ecopreneurship, School for Life Sciences, University of Applied Sciences Northwestern Switzerland, Hofackerstrasse 30, 4132 Muttenz, Switzerland; dirk.hengevoss@fhnw.ch

\* Correspondence: stephen.wittkopf@hslu.ch; Tel.: +41-41-349-3625

† These authors contributed equally to this work.

Version January 2, 2019 submitted to Buildings

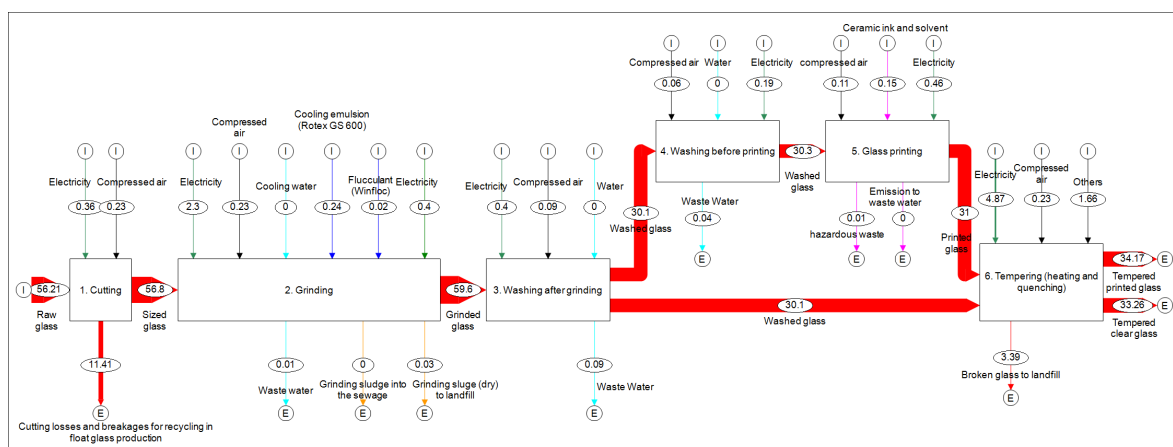

**Figure S1.** Environmental impact of multi-coloured solar glass production for a PV laminate of size 1.1615 m<sup>2</sup>, expressed in eco-points (kPt). The main input material, raw float glass, dominates with 56.21 kPt, including 14.8kPt due to glass loss, making up for 83% of the total impact. Its impact infact exceeds the total of all other inputs and fabricating processes (11.21 kPt), which contribute 17%. (Data courtesy of Glas Trösch AG, 2018).

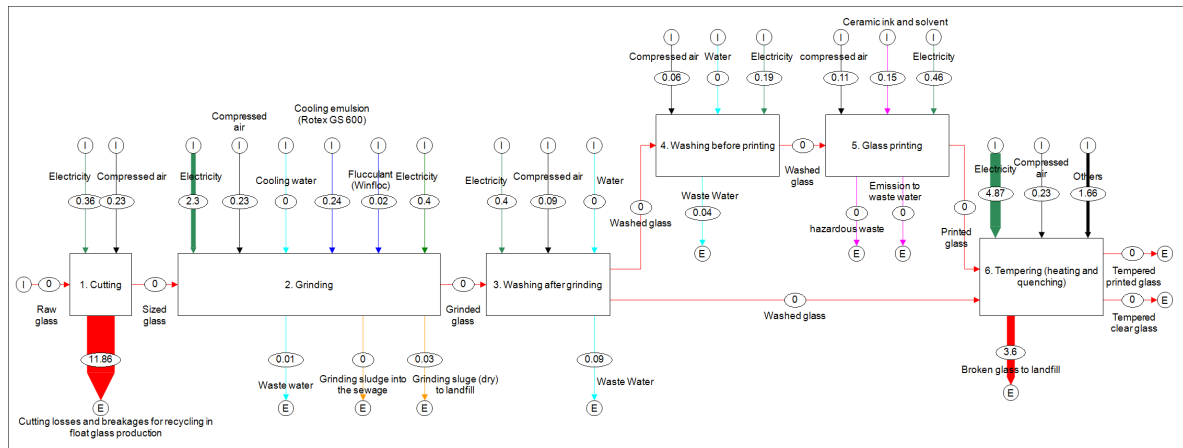

**Figure S2.** Figure S1 with impact of glass suppressed to highlight that of other flows. Glass losses from cutting and electricity consumption during tempering are significant (11.86 resp. 4.87 kPt), while the net impact of the printing process is merely 1 kPt.

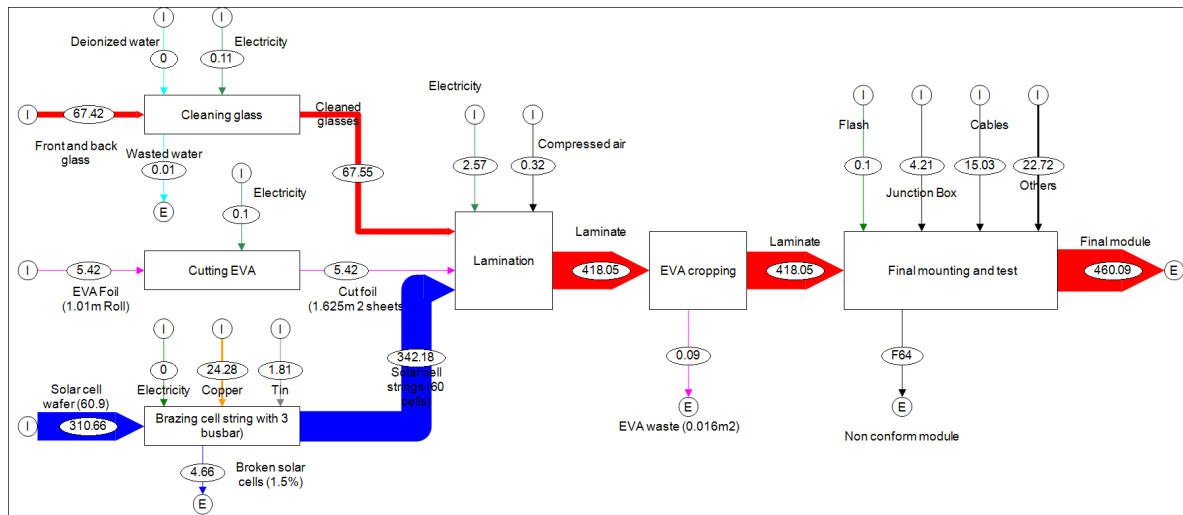

**Figure S3.** Eco-points (kPt) to produce 1.615 m<sup>2</sup> of a multi-coloured glass-glass PV laminate with 60 crystalline silicon cells, a junction box and connecting cable. Arrowheads labelled *I* denote and import flow, indicating an input material or energy, while those labelled *E* denote an export flow, indicating a waste or loss. Data was derived from literature and updated with material balance data and measured electricity consumption of the production steps and supporting processes provided by a German PV module manufacturer. (Data courtesy of GES Gebäude- und Energiesysteme GmbH, 2018).

**Table S1.** Itemised energy and material flows for the production of a clear and multi-coloured solar glass for a PV laminate of size 1.615 m<sup>2</sup>.

| Process                       | Flow                                                              | Quantity | Unit | Remark                                                                        | Data source                                                                                                                             |
|-------------------------------|-------------------------------------------------------------------|----------|------|-------------------------------------------------------------------------------|-----------------------------------------------------------------------------------------------------------------------------------------|
| <b>Cutting</b>                | Raw glass                                                         | 43.24    | kg   | Supplied from a European float glass supplier, transportation 300 km by lorry | Ecoinvent 3.4 data, updated with data from Euroglas GmbH <sup>1</sup> , Glass for Europe <sup>2</sup> , and Glas Trösch AG <sup>3</sup> |
|                               | Cutting losses, breakages for recycling in float glass production | 9.12     | kg   | 20% of raw glass, will be recycled in float glass production                  | Glas Trösch AG <sup>4</sup>                                                                                                             |
|                               | Electricity                                                       | 0.759    | kWh  |                                                                               | Measured value                                                                                                                          |
|                               | Compressed air                                                    | 4.264    | kWh  | Handling device and machine                                                   | Estimated value                                                                                                                         |
| <b>Grinding</b>               | Sized glass                                                       | 34.12    | kg   |                                                                               |                                                                                                                                         |
|                               | Cooling emulsion                                                  | 0.01     | kg   |                                                                               | Glas Trösch AG <sup>4</sup>                                                                                                             |
|                               | Cooling water                                                     | 4.8      | kg   | Water will be recycled                                                        | Estimated 10% of total water consumption according to Glas Trösch AG <sup>4</sup>                                                       |
|                               | Flucculant                                                        | 0.0053   | kg   | Waste water treatment                                                         | For waste water treatment                                                                                                               |
|                               | Electricity                                                       | 4.829    | kWh  | Grinding and water treatment                                                  | Measured value                                                                                                                          |
|                               | Compressed air                                                    | 0.49     | kWh  | Grinding and water treatment                                                  | Estimated value                                                                                                                         |
|                               | Waste water                                                       | 4.8      | kg   | After waste water treatment                                                   | Estimated from total water consumption according to Glas Trösch AG <sup>4</sup>                                                         |
|                               | Grinding sludge into sewage                                       | 0.0096   | kg   | Grinding sludge not removed from waste water                                  | Glas Trösch AG <sup>4</sup>                                                                                                             |
|                               | Dry grinding sludge to landfill                                   | 0.096    | kg   | Grinding sludge in waste water                                                | Glas Trösch AG <sup>4</sup>                                                                                                             |
| <b>Washing after grinding</b> | Ground glass                                                      | 34.12    | kg   |                                                                               |                                                                                                                                         |
|                               | Deionised water                                                   | 30.8     | kg   | High water consumption to remove sludge                                       | Estimated 50% of total water consumption (Material and energy balance from Glas Trösch for 2017)                                        |
|                               | Waste water                                                       | 30.8     | kg   |                                                                               | Estimated 50% of total waste water according to Glas Trösch AG <sup>4</sup>                                                             |
|                               | Electricity                                                       | 0.8476   | kWh  | High standby consumption due to under-utilisation                             | Estimated from nominal power and operating time 2 units × (64kW × 2760 hrs/y) / (production m <sup>2</sup> /y) × 1.615 m <sup>2</sup>   |
|                               | Compressed air                                                    | 0.196    | kWh  | Handling device and machine                                                   | Estimated 10% of total compressed air                                                                                                   |
|                               | Washed glass                                                      | 34.12    | kg   |                                                                               |                                                                                                                                         |

<sup>1</sup> ift Rosenheim GmbH, *Umweltdeklaration (EDP) für Flachglas, Einscheibensicherheitsglas, Verbundsicherheitsglas*. Technical Report M-EPD-FEV-002005, Euroglas GmbH, 2017. [https://www.glastroesch.ch/fileadmin/content/euroglas/Deutsch/Service/Zertifizierungen/EPD/2018-03-20\\_Euroglas\\_M-EPD\\_FG\\_ESG\\_VSG\\_002\\_.pdf](https://www.glastroesch.ch/fileadmin/content/euroglas/Deutsch/Service/Zertifizierungen/EPD/2018-03-20_Euroglas_M-EPD_FG_ESG_VSG_002_.pdf)

<sup>2</sup> Usbeck, V.C.; Pflieger, J.; Sun, T. *Life Cycle Assessment of Float Glass*. Technical report, Glass for Europe, 2010. <https://www.agc-younglass.com/agc-glass-europe/au/de/pdf/lca/LCA.pdf>

<sup>3</sup> Personal Communication with P. Schaad of Glas Trösch AG, <https://www.overleaf.com/3656332281zxqsfrsnbcz> 25.05.2018

<sup>4</sup> Material and energy balance from Glas Trösch AG for 2017

Table S1. *Cont.*

| Process                        | Flow                     | Quantity | Unit | Remark                                                                   | Data source                                                                                                                                                                    |
|--------------------------------|--------------------------|----------|------|--------------------------------------------------------------------------|--------------------------------------------------------------------------------------------------------------------------------------------------------------------------------|
| <b>Washing before printing</b> | Washed glass             | 16.15    | kg   |                                                                          |                                                                                                                                                                                |
|                                | Deionised water          | 14.6     | kg   |                                                                          | Estimated 25% of total water consumption according to Glas Trösch AG <sup>4</sup>                                                                                              |
|                                | Waste Water              | 14.6     | kg   |                                                                          | Estimated 25% of total waste water according to Glas Trösch AG <sup>4</sup>                                                                                                    |
|                                | Electricity              | 0.401    | kWh  | High standby consumption due to under-utilisation                        | Estimated from nominal power and operating time $2 \text{ units} \times (64 \text{ kW} \times 2760 \text{ hrs/y}) / (\text{production m}^2/\text{y}) \times 1.615 \text{ m}^2$ |
|                                | Compressed air           | 0.116    | kWh  | Handling device and machine                                              | Estimated 10% of total compressed air                                                                                                                                          |
| <b>Printing</b>                | Washed glass             | 16.15    | kg   |                                                                          |                                                                                                                                                                                |
|                                | Ceramic ink and solvent  | 18.28    | g    |                                                                          | Glas Trösch AG <sup>4</sup>                                                                                                                                                    |
|                                | hazardous waste          | 5        | g    |                                                                          | Glas Trösch AG <sup>4</sup>                                                                                                                                                    |
|                                | Emission to waste water  | 0.454    | g    |                                                                          | Glas Trösch AG <sup>4</sup>                                                                                                                                                    |
|                                | Electricity              | 0.969    | kWh  | Digital printing, drying, and curing                                     | Glas Trösch AG <sup>3</sup>                                                                                                                                                    |
|                                | compressed air           | 0.232    | kWh  | Handling device and machine                                              |                                                                                                                                                                                |
| <b>Tempering</b>               | Printed glass            | 16.15    | kg   |                                                                          |                                                                                                                                                                                |
|                                | Clear glass              | 16.15    | kg   |                                                                          |                                                                                                                                                                                |
|                                | Broken glass to landfill | 1.82     | kg   |                                                                          | Glas Trösch AG <sup>3,4</sup>                                                                                                                                                  |
|                                | Electricity              | 10.237   | kWh  | Heating and quenching, high standby consumption due to under-utilisation | Glas Trösch AG <sup>3</sup>                                                                                                                                                    |
|                                | compressed air           | 0.49     | kWh  | Handling device and machine                                              | Estimated 25% of total compressed air                                                                                                                                          |
|                                | Tempered glass           | 32.3     | kg   |                                                                          |                                                                                                                                                                                |

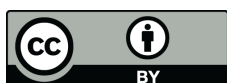

© by the authors. Licensee MDPI, Basel, Switzerland. This article is an open access article distributed under the terms and conditions of the Creative Commons Attribution (CC BY) license (<http://creativecommons.org/licenses/by/4.0/>).
